# Supplementary material
Source: Springer Nature journal article supplement (https://www.springermedizin.de/resource/supplementary/12885_2012_3796_MOESM4_ESM.pdf/9464442)

**(A)** Gleason score < 9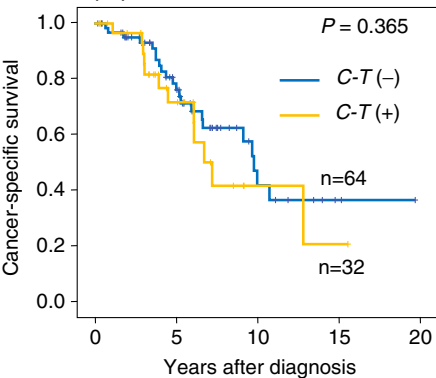**(B)** Gleason score  $\geq 9$ 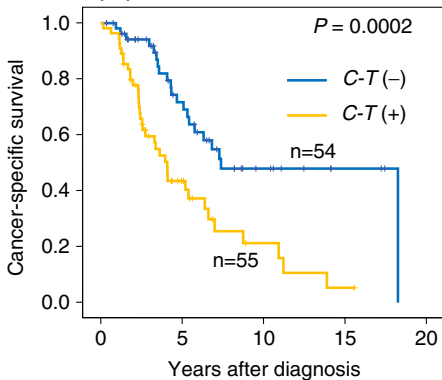**(C)** ALP < 350 IU/L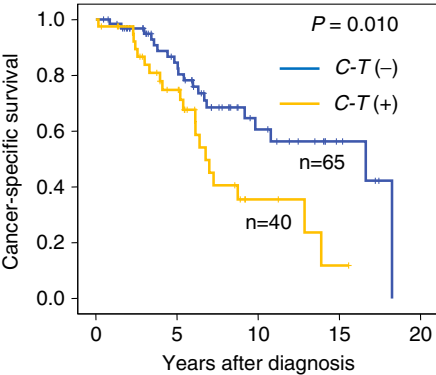**(D)** ALP  $\geq 350$  IU/L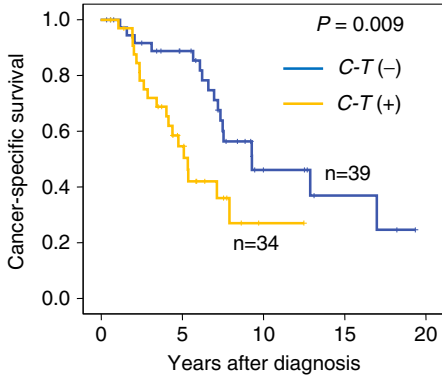

Supplement: MOESM4 [file 9464442]
